# Supplementary material
Source: PubMed Central journal article supplement (PMC4817868)
Supplement: mt201599x1.pdf [file mt201599x1.pdf]

**Table S1:** CSF nucleated cell counts in MPS I dogs following vector injection (Cells/ $\mu$ L)

| Animal No. | Day post IT vector |    |                   |    |    |
|------------|--------------------|----|-------------------|----|----|
|            | 0                  | 7  | 21                | 51 | 81 |
| 549        | 1                  | ND | 2                 | 0  | 0  |
| 550        | 2                  | ND | 11 <sup>a</sup>   | BC | 2  |
| 552        | 0                  | ND | ND                | 2  | 2  |
| 553        | 2                  | ND | 1485 <sup>c</sup> | 2  | 2  |
| 554        | 0                  | ND | 14 <sup>b</sup>   | 1  | 2  |
| 562        | 2                  | BC | 1                 | 0  | 0  |
| 563        | BC                 | 1  | 29 <sup>b</sup>   | 1  | 0  |
| 564        | 1                  | 1  | 4                 | 0  | 0  |

ND = not done, BC = Blood contamination of CSF sample (>500 erythrocytes/ $\mu$ L), IT=intrathecal.

Normative range  $\leq 5$  cells/ $\mu$ L.

- 317 erythrocytes/ $\mu$ L
- >70% lymphocytes
- >70% monocytes

**Table S2: Vector biodistribution<sup>a</sup>**

|                      | I-550    | I-553                | I-554    | I-549    | I-552    | I-562    | I-563    | I-564    |
|----------------------|----------|----------------------|----------|----------|----------|----------|----------|----------|
| Frontal cortex       | 0.207224 | 0.032837             | 0.037931 | 0.195879 | 0.311028 | 0.053383 | 0.014606 | 0.41984  |
| Temporal cortex      | 0.324461 | 0.015715             | 0.042556 | 0.682856 | 0.024615 | 0.075457 | 0.539041 | 0.541367 |
| Occipital cortex     | 0.240198 | 0.03092              | 0.068607 | 0.585868 | 0.158689 | 0.006249 | 0.021576 | 0.724321 |
| Hippocampus          | 0.007486 | 0.032587             | 0.058214 | 0.008692 | 0.336849 | 0.01288  | 0.056152 | 0.065506 |
| Medulla              | 0.156078 | 0.012703             | 0.004936 | 0.063498 | 0.194763 | 0.294345 | 0.032355 | 0.020695 |
| Cerebellum           | 0.022631 | 0.014178             | 0.010712 | 0.061944 | 0.046369 | 0.025023 | 0.026128 | 0.02586  |
| Spinal cord cervical | 0.257116 | 0.034117             | 0.014234 | 0.165666 | 0.509951 | 0.510722 | 0.046194 | 0.093024 |
| Spinal cord thoracic | 0.43775  | 0.063695             | 0.02829  | 0.359055 | 0.140467 | 0.120746 | 0.079992 | 0.100718 |
| Spinal cord lumbar   | 0.190243 | 0.03037              | 0.116436 | 0.460682 | 0.313737 | 0.225627 | 0.241252 | 0.263238 |
| Heart                | 0.001076 | <0.0005 <sup>b</sup> | 0.001983 | 0.00145  | 0.001454 | 0.02967  | 0.005545 | 0.005753 |
| Lung                 | 0.000879 | 0.002424             | 0.001887 | 0.000491 | 0.000538 | 0.000667 | 0.001105 | 0.001883 |
| Liver                | 0.001304 | 0.004242             | 0.001918 | 0.010545 | 0.206071 | 0.030681 | 0.006334 | 0.028654 |
| Spleen               | 0.002579 | 0.001543             | 0.001228 | 0.002596 | 0.002229 | 0.044439 | 0.003144 | 0.008972 |

a. Values are genome copies (GC) per diploid genome. The assay does not distinguish between the AAV8 and AAV9 vectors.

b. Limit of detection

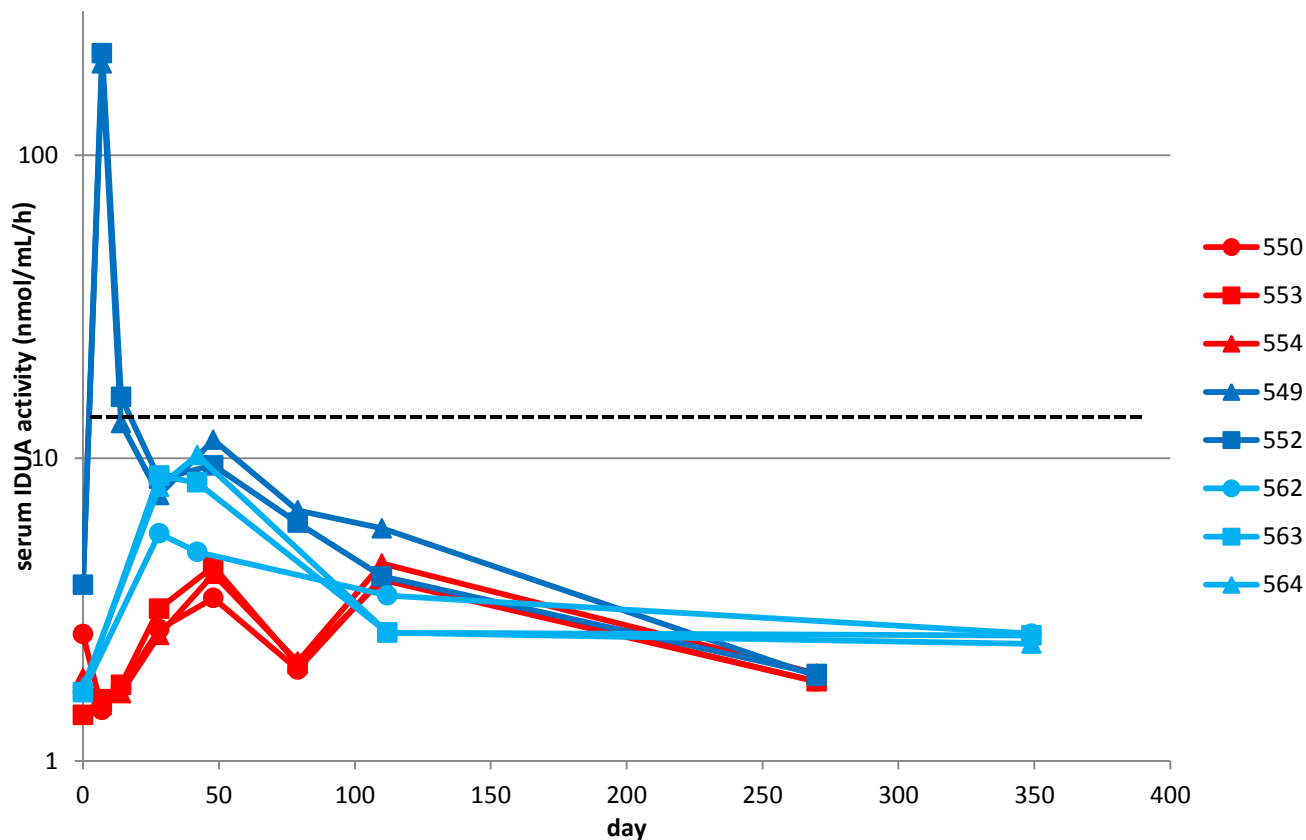

**Fig S1:** Serum IDUA activity in MPS I dogs.

MPS I dogs were treated with an intravenous injection of an AAV8 vector encoding canine IDUA under control of a liver specific promoter on postnatal day 1 (I-549, I-552) or postnatal day 7 (I-562, I-563, I-564) followed by intrathecal injection of an AAV9 vector at one month of age. Serum was serially collected from treated animals and assayed for IDUA enzyme activity. The dotted line indicates normal serum IDUA activity.

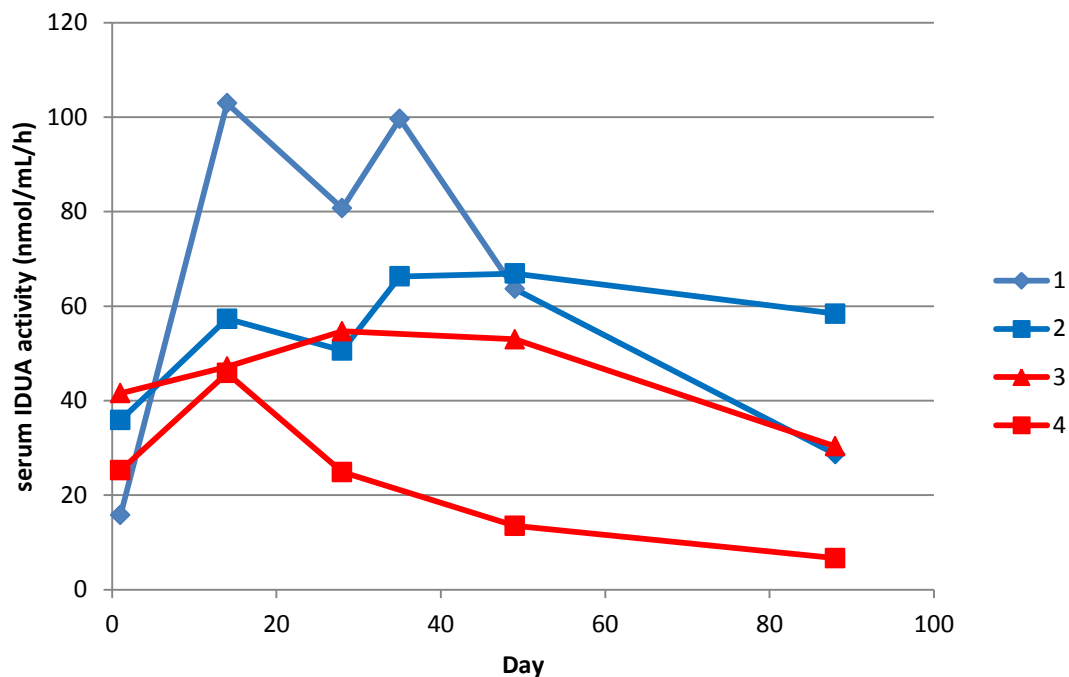

**Fig S2.** Serum IDUA activity in rhesus monkeys.

Newborn rhesus macaques were administered an AAV8 vector intravenously expressing human IDUA (animal 1 and 2) or human factor IX (3 and 4). All four were administered an intrathecal injection of an AAV9 vector expressing human IDUA at one month of age. Serum was serially collected from treated animals and assayed for IDUA enzyme activity.
